# Supplementary material for: Quantum dynamics of the temporary capture of light atoms by superfluid helium nanodroplets at very low collision energies (≈1–13 meV): the case of the hydrogen atom and its isotopes
Source: Royal Society of Chemistry journal article supplement (doi:10.1039/d5cp01498k), 2025-01-01
Supplement: d5cp01498k1.pdf [file d5cp01498k1.pdf]

## SUPPLEMENTARY INFORMATION

# Quantum dynamics of the temporary capture of light atoms by superfluid helium nanodroplets at very low collision energies ( $\approx 1$ -13 meV). The case of the hydrogen atom and its isotopes

Michael G. Sternberg,<sup>a</sup> Stephen K. Gray,<sup>a</sup> and Miguel González<sup>b,\*</sup>

<sup>a</sup>Center for Nanoscale Materials, Argonne National Laboratory, 9700 S. Cass Avenue, Lemont, IL 60439, USA

<sup>b</sup>Departament de Ciència de Materials i Química Física and Institut de Química Teòrica i Computacional (IQTC),  
Universitat de Barcelona, Martí i Franquès 1-11, 08028 Barcelona, Spain

## Supplementary Information Contents

|                                                                                                                                                  | Page |
|--------------------------------------------------------------------------------------------------------------------------------------------------|------|
| <b>Figure S1.</b> Snapshots of the atomic WP probability density and helium density for the D atom at $E_{k,0} = 42.52$ K (condition of Movie 4) | 2    |
| <b>Figure S2.</b> Time evolution of the change in the kinetic energy of the atom.                                                                | 3    |
| <b>Figure S3.</b> Change in the energy of the HeND, at the barrier vs. $E_{k,0}$ .                                                               | 4    |
| <b>Figure S4.</b> Change in the energy of the HeND at the minimum vs. $E_{k,0}$ .                                                                | 4    |
| <b>Figure S5.</b> Reflection probability of the atomic WP vs. $E_{k,0}$ .                                                                        | 5    |
| <b>Movie 1.</b> Time evolution of the atomic WP probability density and helium density for the H atom at $E_{k,0} = 27.73$ K.                    | 5    |
| <b>Movie 2.</b> Same as Movie 1 but for the H atom at $E_{k,0} = 47.23$ K.                                                                       | 5    |
| <b>Movie 3.</b> Same as Movie 1 but for the D atom at $E_{k,0} = 23.04$ K.                                                                       | 5    |
| <b>Movie 4.</b> Same as Movie 1 but for the D atom at $E_{k,0} = 42.52$ K.                                                                       | 5    |

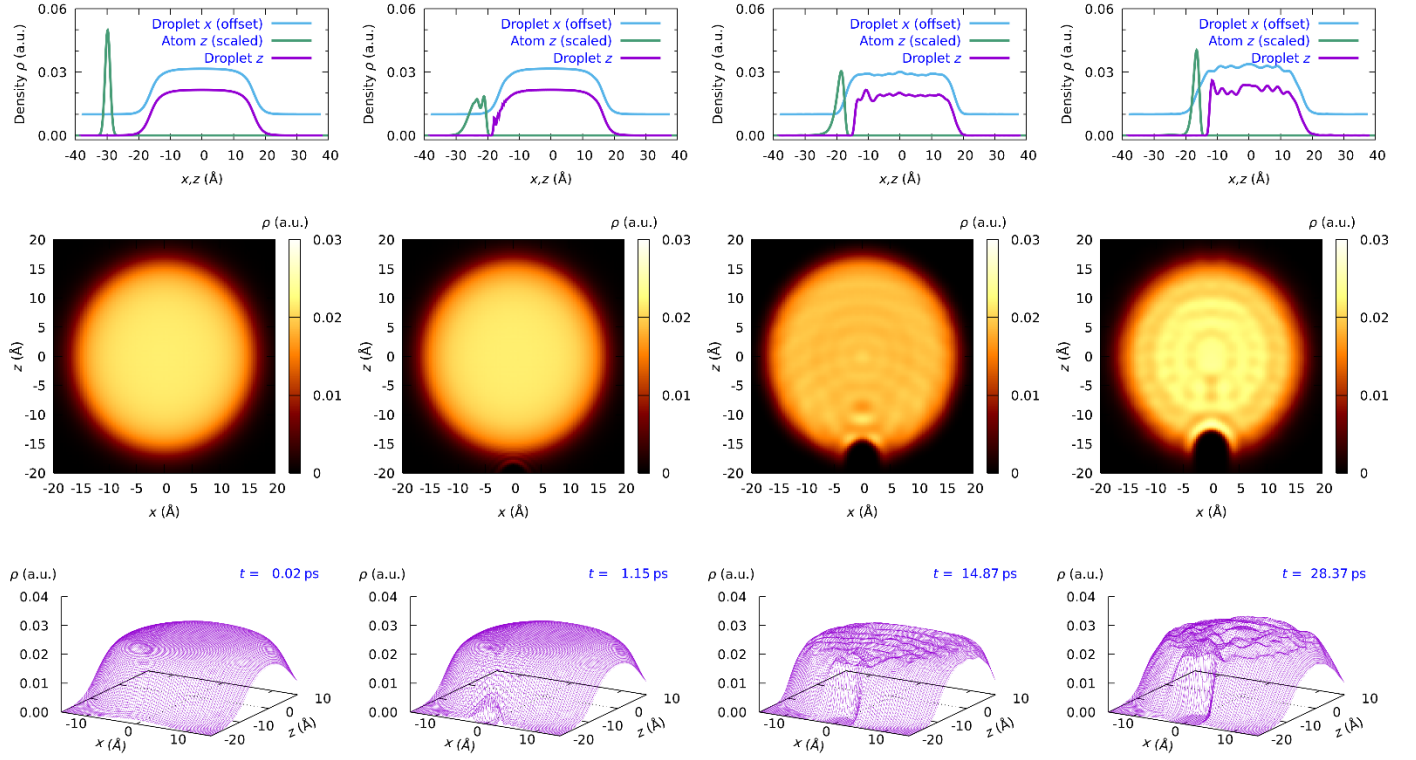

**Figure S1.** Snapshots of the atomic WP probability density and helium density for the D atom at  $E_{k,0} = 42.52_K$  (condition of Movie 4) at four representative times (initial, collision with the surface, in the dimple and also in the dimple): WP probability density and helium density along the  $z$  axis (top); helium density (2D) in the  $xz$  plane (middle); helium density (3D) in the  $xz$  plane (bottom). A H---HeND collision complex with a lifetime higher than 40 ps is observed.

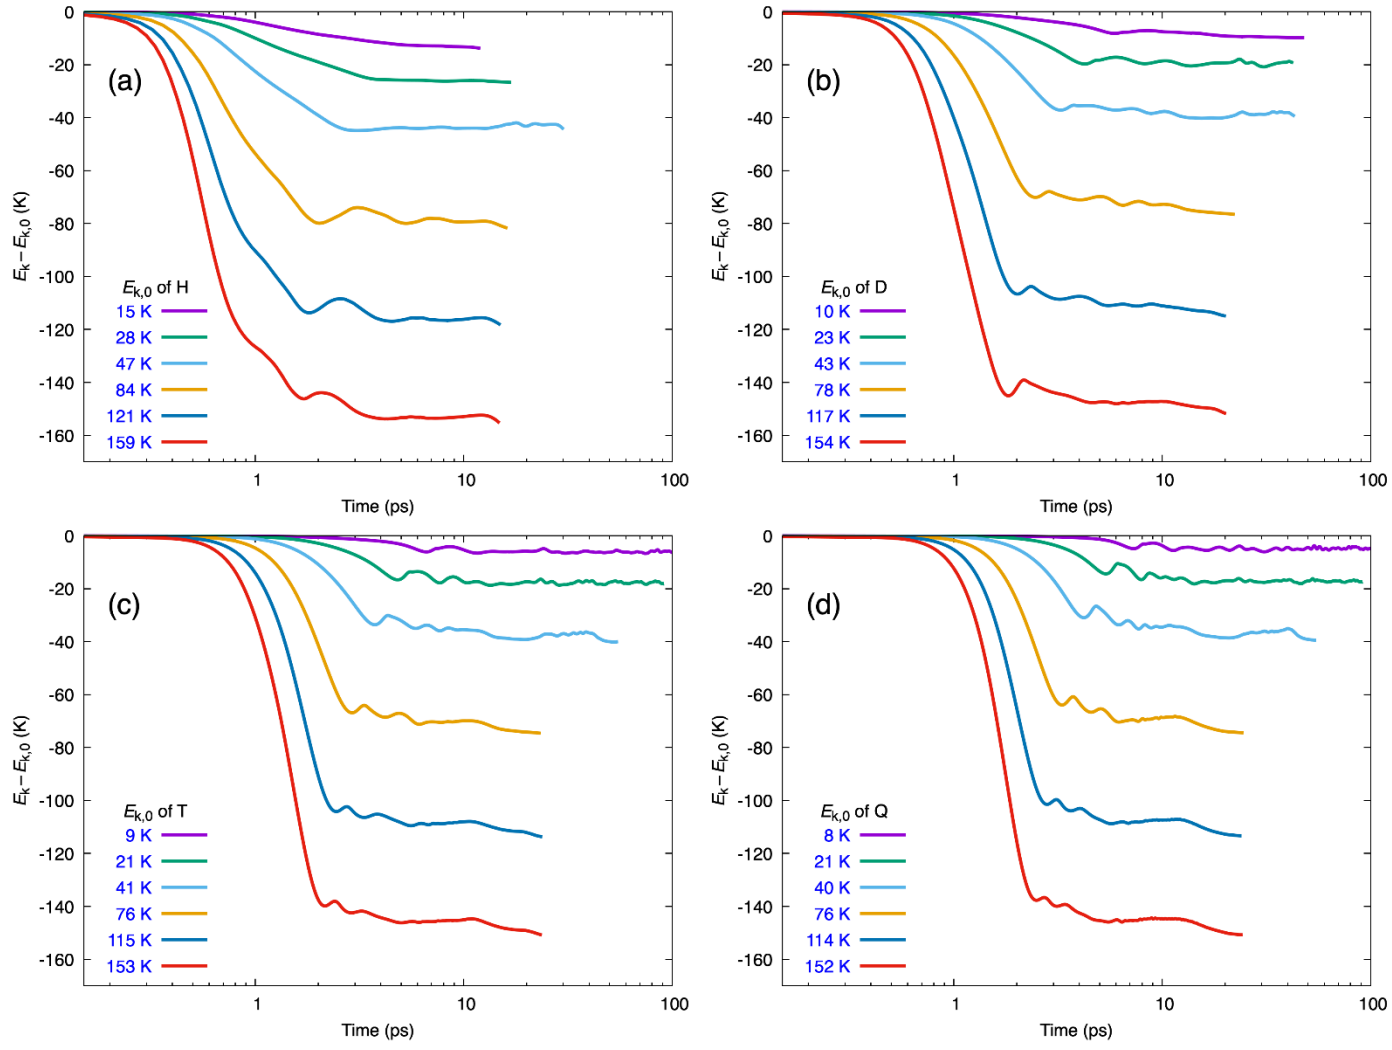

**Figure S2.** Time evolution of the change in the kinetic energy of the atom with respect to the initial value ( $E_k - E_{k,0}$ ), for the four isotopic variants (H, D, T and Q).

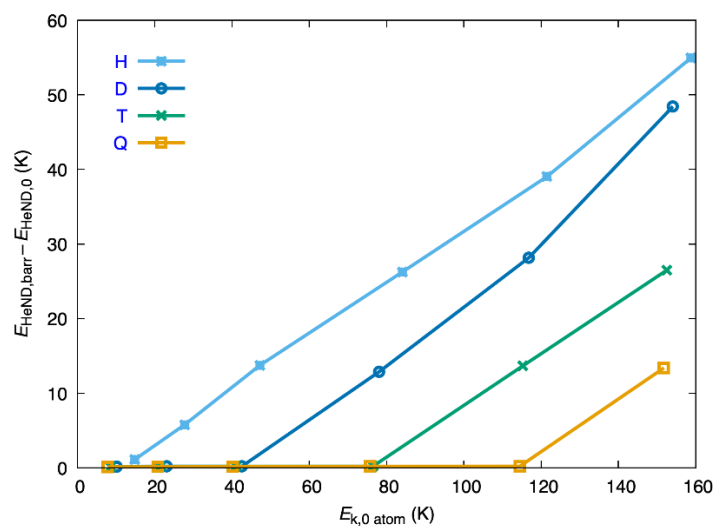

**Figure S3.** Change in the energy of the HeND, at the dynamical barrier, as a function of the initial kinetic energy of the atom, for the four isotopes.

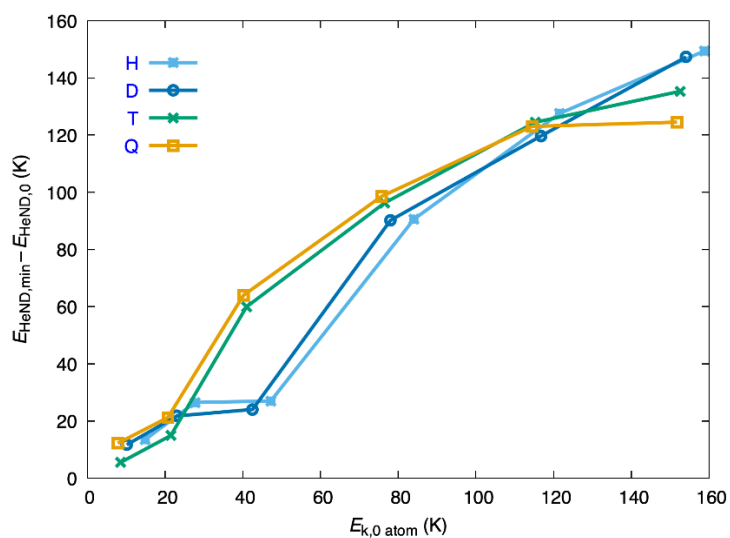

**Figure S4.** Change in the energy of the HeND, at the minimum, as a function of the initial kinetic energy of the atom, for the four isotopes.

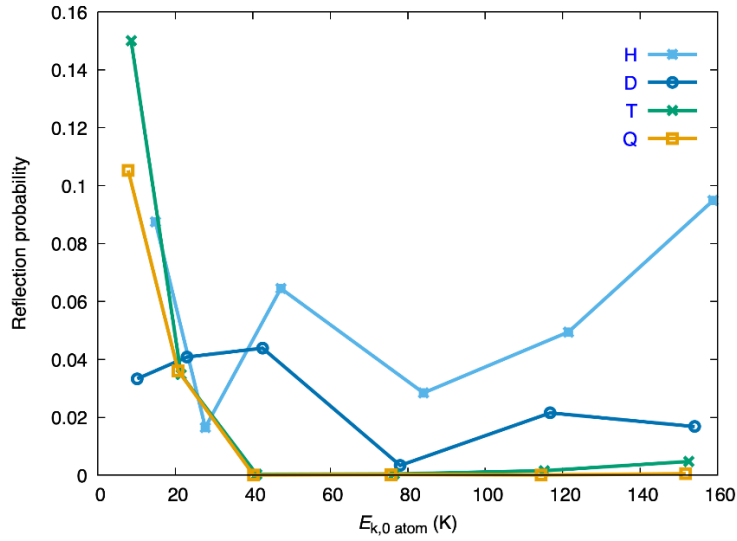

**Figure S5.** Reflection probability of the atomic WP, as a function of the initial kinetic energy of the atom, for the four isotopes.

**Movie 1.** Time evolution of the atomic WP probability density and helium density for the H atom at  $E_{k,0} = 27.73$  K, where the formation of a H---HeND collision complex with a lifetime of 1.3 ps is observed. Top left: helium density in the xz plane (3D). Top right: WP probability density and helium density along the z axis. Bottom left: helium density in the xz plane (2D). Bottom right: Interaction energy atom-HeND and atomic WP norm. Simulated time interval represented  $\approx 0$ -17 ps. See the file “Movie1\_H\_28”.

**Movie 2.** Time evolution of the atomic WP probability density and helium density for the H atom at  $E_{k,0} = 47.23$  K, where the formation of a H---HeND collision complex with a lifetime of 4.3 ps is observed. Same comments as for Movie 1. Simulated time interval represented  $\approx 0$ -30 ps. See the file “Movie2\_H\_47”.

**Movie 3.** Time evolution of the atomic WP probability density and helium density for the D atom at  $E_{k,0} = 23.04$  K, where the formation of a D---HeND collision complex with a lifetime  $> 40$  ps is observed. Same comments as for Movie 1. Simulated time interval represented  $\approx 0$ -43 ps. See the file “Movie3\_D\_23”.

**Movie 4.** Time evolution of the atomic WP probability density and helium density for the D atom at  $E_{k,0} = 42.52$  K, where the formation of a D---HeND collision complex with a lifetime  $> 40$  ps is observed. Same comments as for Movie 1. Simulated time interval represented  $\approx 0$ -43 ps. See the file “Movie4\_D\_43”.
